# Supplementary material for: An on-demand gas segmented flow generator with high spatiotemporal resolution for in vivo analysis of neuronal response in C. elegans
Source: Royal Society of Chemistry journal article supplement (doi:10.1039/c6lc00948d), 2016-01-01
Supplement: c6lc00948d1.pdf [file c6lc00948d1.pdf]

## Supporting information

### **An on-demand gas segmented flow generator with high spatiotemporal resolution for *in vivo* analysis of neuronal response in *C. elegans***

Liang Hu,<sup>ab</sup> Anle Ge,<sup>a</sup> Xixian Wang,<sup>a</sup> Shanshan Wang,<sup>a</sup> Yue Gao,<sup>c</sup> Xiaojun Feng,<sup>a</sup>  
Wei Du<sup>\*a</sup> and Bi-Feng Liu<sup>\*a</sup>

*<sup>a</sup>Britton Chance Center for Biomedical Photonics at Wuhan National Laboratory for Optoelectronics – Hubei Bioinformatics & Molecular Imaging Key Laboratory, Systems Biology Theme, Department of Biomedical Engineering, College of Life Science and Technology, Huazhong University of Science and Technology, Wuhan 430074, China*

*<sup>b</sup>Brain Research Center, Wuhan Institute of Physics and Mathematics, Chinese Academy of Sciences, Wuhan 430071, China*

*<sup>c</sup>Optic Information Science & Technology, School of Physics, Sun Yat-Sen University.*

---

\*Corresponding author

Dr. Bi-Feng Liu, Department of Biomedical Engineering, College of Life Science and Technology, Huazhong University of Science and Technology, Wuhan 430074, China  
Email: bfliu@mail.hust.edu.cn, Tel: +86-27-87792203

Dr. Wei Du, **Department** of Biomedical Engineering, College of Life Science and Technology, Huazhong University of Science and Technology, Wuhan 430074, China  
Email: weidu@mail.hust.edu.cn, Tel: +86-27-87793180

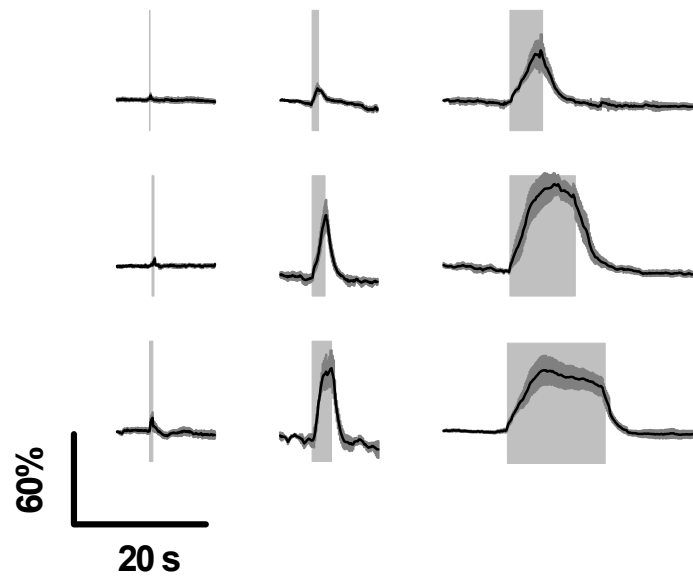

Figure S1 O<sub>2</sub> pulse-evoked URX neuronal activities in *C. elegans*. Stimuli durations are 0.1, 0.3, 0.5, 1, 2, 3, 5, 10 and 15 s respectively. Black line and dark grey shadow indicate the mean value and standard error of the mean (SEM). Each trail repeats 5 times.

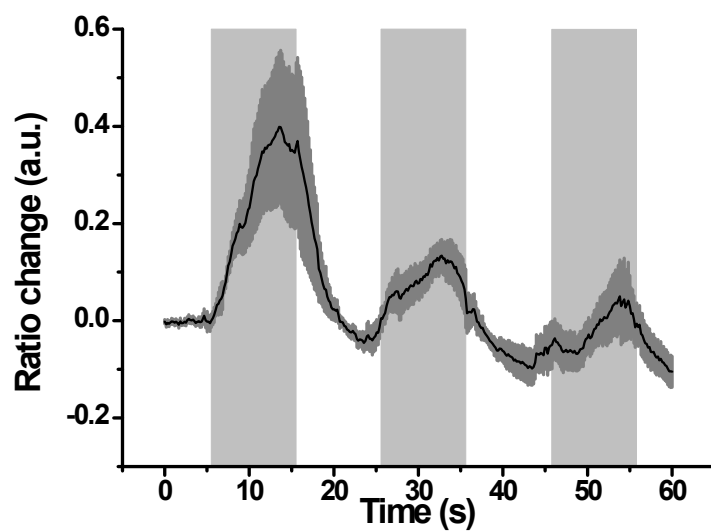

Figure S2 Multiple O<sub>2</sub> pulses with 10 s duration and 10 s interval evoked calcium transients in URX neurons. Black line and dark grey shadow indicate the mean value and SEM (n = 5).
